# Supplementary material for: Recommended Interventions for Enhanced Recovery After Cesarean Delivery in the United States
Source: medRxiv preprint, doi:10.1101/2024.11.05.24316713, version 2 (2024-11-07)
Supplement: Appendix 3 [file 316713_file05.docx]

**Appendix 3. List of ERAC interventions considered in Round 1**

| **Preoperative interventions (16)** |
| --- |
| Patient education |
| Patient counselling - lifestyle |
| Staff education |
| Breastfeeding preparation and information |
| Weight management, blood pressure, glycemic control if applicable |
| Hemoglobin optimization |
| Preoperative identification of patients appropriate for enhanced recovery |
| Midwife consultation |
| Limit preoperative fasting times |
| Antacid prophylaxis |
| Optimization of gastric emptying |
| Carbohydrate drink |
| Abdominal skin preparation |
| Check blood glucose pre-operatively if diabetic / gestational diabetes |
| Acetaminophen administered preoperatively |
| NSAID administered preoperatively |

NSAID=non-steroidal anti-inflammatory drug

| **Intraoperative interventions (26)** |
| --- |
| Prophylactic antibiotics |
| Maintain normothermia |
| IV fluids to achieve euvolemia |
| Fluid restrictive regimen |
| Partner / support person allowed to be present during surgery under neuraxial anesthesia |
| Long-acting neuraxial opioid |
| Prevention of spinal hypotension |
| Treatment of spinal hypotension |
| Anti-emetic prophylaxis (single agent) |
| Anti-emetic prophylaxis (≥2 agents) |
| Peripheral nerve/fascial plane blocks |
| Local anesthesia wound infiltration (single-shot) |
| Local anesthesia wound infiltration (continuous infusion) |
| Acetaminophen administered intraoperatively |
| NSAIDs administered intraoperatively |
| Optimal uterotonics |
| Delayed cord clamping |
| Early skin to skin contact |
| Vaginal preparation with povidine-iodine |
| Abdominal antimicrobial cleansing |
| Sub-cuticular wound closure |
| Closure of hysterotomy in 2 layers and non-closure of peritoneum |
| If >2cm subcutaneous tissue, re-approximation of tissue layer |
| Blunt expansion of transverse uterine hysterotomy |
| Air not oxygen for neonatal resuscitation |
| Maintain normothermia |

NSAIDs=non-steroidal anti-inflammatory drugs

| **Postoperative interventions (28)** |
| --- |
| Early mobilization and ambulation |
| Early removal of urinary catheter |
| Early drinking |
| Early feeding |
| Sham feeding |
| Day 1 blood tests |
| Anemia remediation |
| Venous thromboembolism prophylaxis |
| Scheduled course of antibiotics |
| Early dressing removal |
| Incentive spirometry |
| Routine glucose monitoring, and tight control if treated |
| Standardized rescue medication protocol for side-effects |
| Early removal of IV fluid |
| Early removal of IV cannula |
| Acetaminophen |
| NSAIDs |
| IV acetaminophen and/or NSAIDs for prescribed period |
| Oral opioids |
| Minimize opioid consumption |
| Breastfeeding support / education |
| Infant temperature monitoring |
| Neonatal discharge checklist |
| Early communication with community midwife or carer |
| Early maternal discharge |
| Discharge education and counselling |
| Promote resting periods |
| Standardized written discharge instructions |

IV=intravenous; NSAIDs=non-steroidal anti-inflammatory drugs
